# Supplementary material for: Optimization of Direct Aromatic 18F-Labeling of Tetrazines
Source: MDPI journal article supplement (doi:10.3390/molecules27134022), 2022-06-22
Supplement: s1 [file s1]

# Optimization of Direct Aromatic $^{18}\text{F}$ -Labeling of Tetrazines

Ida Vang Andersen <sup>1,†</sup>, Rocío García-Vázquez <sup>1,2,†</sup>, Umberto M. Battisti <sup>1</sup> and Matthias M. Herth <sup>1,2,\*</sup>

<sup>1</sup> Department of Drug Design and Pharmacology, Faculty of Health and Medical Sciences, University of Copenhagen, Jagtvej 160, 2100 Copenhagen, Denmark; ida.andersen@sund.ku.dk (I.V.A.); rociogv@sund.ku.dk (R.G.-V.); umberto.battisti@sund.ku.dk (U.M.B.)

<sup>2</sup> Department of Clinical Physiology, Nuclear Medicine & PET, Rigshospitalet, Blegdamsvej 9, 2100 Copenhagen, Denmark

\* Correspondence: matthias.herth@sund.ku.dk

† These authors contributed equally to this work

## Table of Contents

|                                                                                                         |   |
|---------------------------------------------------------------------------------------------------------|---|
| General reaction scheme .....                                                                           | 2 |
| Radiochemistry .....                                                                                    | 3 |
| Analytical Radio-HPLC and semi-preparative HPLC chromatograms of formulated [ $^{18}\text{F}$ ]Tzs..... | 4 |
| Chromatograms of manual synthesis .....                                                                 | 4 |
| Chromatograms of automated synthesis.....                                                               | 5 |

## General reaction scheme

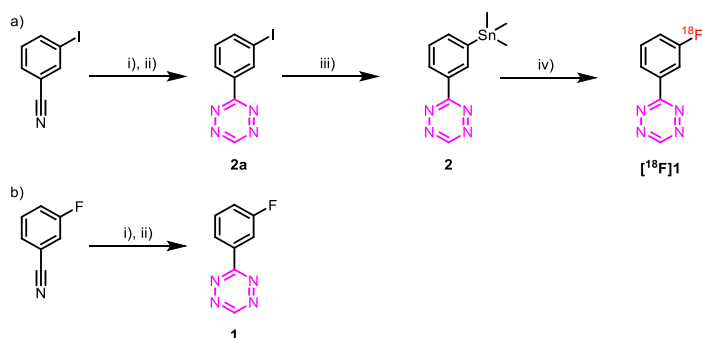

**Scheme S1.** Synthesis of Tzs [<sup>18</sup>F]1 (a) and 1 (b). i) DCM, S<sub>8</sub>, NH<sub>2</sub>NH<sub>2</sub> · H<sub>2</sub>O, EtOH, 50 °C, 24 h; ii) NaNO<sub>2</sub>, AcOH, 0 °C, 20 min, 33% (2), 34% (1); iii) (Me<sub>3</sub>Sn)<sub>2</sub>, Pd(OAc)<sub>2</sub>, <sup>m</sup>CgPPh, THF, 70 °C, MW, 30 min., 58% (3); iv) [<sup>18</sup>F]Bu<sub>4</sub>NF, Cu(OTf)<sub>2</sub>Py<sub>4</sub>, DMA, 5 min, 100 °C, 37% RCC ([<sup>18</sup>F]1).

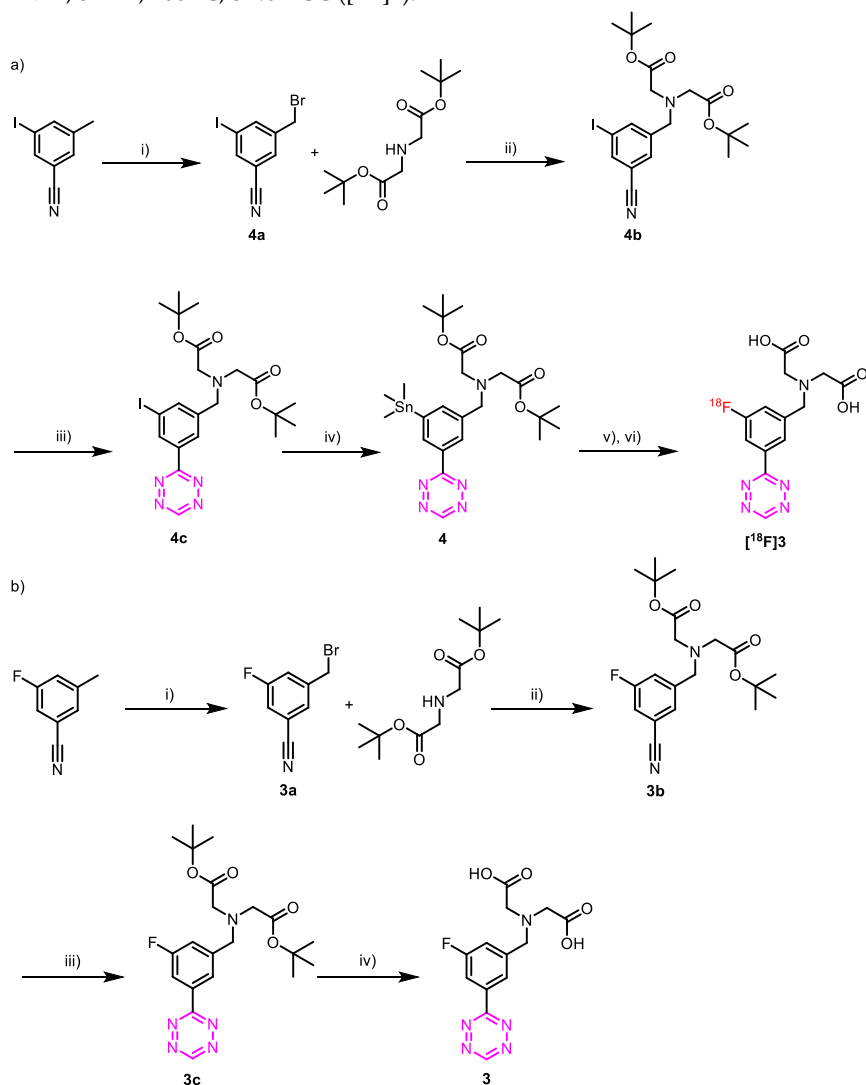

**Scheme S2.** Synthesis of Tzs [<sup>18</sup>F]3 (a) and 3 (b). (a) i) NBS, AIBN, CHCl<sub>3</sub>, 65 °C, 24 h; 49%; ii) K<sub>2</sub>CO<sub>3</sub>, MeCN, 25 °C, 24 h, 99 %; iii) DCM, S<sub>8</sub>, NH<sub>2</sub>NH<sub>2</sub> · H<sub>2</sub>O, EtOH, 50 °C, 24 h, 15–24%; iv) (Me<sub>3</sub>Sn)<sub>2</sub>, Pd(PPh<sub>3</sub>)<sub>4</sub>, THF, 65 °C, MW, 3 h, 62%; v) Cu(OTf)<sub>2</sub>Py<sub>4</sub>, [<sup>18</sup>F]Bu<sub>4</sub>NF, DMA, 5 min, 100 °C; vi) TFA, MeCN, 100 °C, 15 min, 14% RCY; (b) i) NBS, AIBN, CHCl<sub>3</sub>, 65 °C,

12 h, 52%; ii) K<sub>2</sub>CO<sub>3</sub>, MeCN, r.t., 24 h, 89%; iii) DCM, S<sub>8</sub>, NH<sub>2</sub>NH<sub>2</sub> · H<sub>2</sub>O, EtOH, 50 °C, 24 h, 17%; iv) TFA, DCM, 25 °C, 2 h, 51%.

## Radiochemistry

**Table S1.** Optimization of different preconditioning and elution solvents. The crude reaction was followed by radio-TLC. Reaction conditions: QMA preconditioned, [<sup>18</sup>F]fluoride (~50 MBq) loaded, flushed with 0.5 mL MeOH and eluted with one of the eluents shown in the table. Dried under nitrogen gas for 5 min at 100 °C before adding precursor **2** (3.2 mg, 10 μmol) and Cu(OTf)<sub>2</sub>Py<sub>4</sub> (10 mg, 15 μmol) in 0.5 mL DMA, 5 min at 100 °C.

| Precondition                   | Bu <sub>4</sub> NOMs <sup>2</sup> | Et <sub>4</sub> NHCO <sub>3</sub> <sup>2</sup> | KOTf/K <sub>2</sub> CO <sub>3</sub> <sup>1</sup> | Bu <sub>4</sub> NOTf <sup>2</sup> | Bu <sub>4</sub> NH <sub>2</sub> PO <sub>4</sub> <sup>2</sup> | TEAHF <sup>2</sup> |
|--------------------------------|-----------------------------------|------------------------------------------------|--------------------------------------------------|-----------------------------------|--------------------------------------------------------------|--------------------|
| PO <sub>4</sub> <sup>3-</sup>  | 15.9 ± 5                          | 17.8 ± 4                                       | 0                                                | 36.8 ± 5                          | 5.9 ± 3                                                      | 0                  |
| HPO <sub>4</sub> <sup>2-</sup> | 1.5                               | -                                              | -                                                | 1.8                               | -                                                            | -                  |
| OTf <sup>-</sup>               | -                                 | -                                              | 23.3 ± 6                                         | 0                                 | -                                                            | -                  |
| CO <sub>3</sub> <sup>2-</sup>  | 0                                 | -                                              | -                                                | 0                                 | -                                                            | -                  |

<sup>1</sup> Dissolved in 1 mL MeOH. <sup>2</sup> Dissolved in 1 mL H<sub>2</sub>O. RCC% is measured with radio-TLC

**Table S2.** Optimization of precursor and catalyst amount. The crude reaction was followed by radio-TLC and radio-HPLC. Reaction conditions: PO<sub>4</sub><sup>3-</sup> QMA precondition, eluted with Bu<sub>4</sub>NOTf (20 μmol) in MeOH. Precursor **2** (3.2 mg, 10 μmol) and different equivalent of Cu(II) source in DMA, for 5 min at 100 °C.

| Precondition                  | Elution                             | Precursor : Cu(II) source (eq) | RCC% (TLC) | RCC% (HPLC) |
|-------------------------------|-------------------------------------|--------------------------------|------------|-------------|
| OTf <sup>-</sup>              | KOTf/K <sub>2</sub> CO <sub>3</sub> | 1:2:15 <sup>a</sup>            | 11.9 ± 2   | 8.9 ± 4     |
| OTf <sup>-</sup>              | KOTf/K <sub>2</sub> CO <sub>3</sub> | 1:1.5 <sup>b</sup>             | 23.2 ± 7   | 21.4 ± 1    |
| PO <sub>4</sub> <sup>3-</sup> | Bu <sub>4</sub> NOTf                | 1:0.5 <sup>b</sup>             | 1.1 ± 0.1  | -           |
| PO <sub>4</sub> <sup>3-</sup> | Bu <sub>4</sub> NOTf                | 1:1 <sup>b</sup>               | 7.2 ± 0.4  | 5 ± 0.2     |
| PO <sub>4</sub> <sup>3-</sup> | Bu <sub>4</sub> NOTf                | 1:1.5 <sup>b</sup>             | 36.8 ± 5   | 38.6 ± 2    |
| PO <sub>4</sub> <sup>3-</sup> | Bu <sub>4</sub> NOTf                | 1:2 <sup>b</sup>               | 21.9 ± 2   | 26.1 ± 4    |

<sup>a</sup> Cu(OTf)<sub>2</sub> and Pyridine equiv., method from Garcia et al. 2021 [1]. <sup>b</sup> Cu(OTf)<sub>2</sub>Py<sub>4</sub> equiv.

**Table S3.** Optimization of time and temperature. The crude reaction was followed by radio-TLC and radio-HPLC. Reaction conditions: PO<sub>4</sub><sup>3-</sup> QMA precondition, eluted with Bu<sub>4</sub>NOTf (20 μmol) in MeOH. Precursor **2** (3.2 mg, 10 μmol), Cu(OTf)<sub>2</sub>Py<sub>4</sub> (1.5 equiv., 10 mg, 15 μmol) for different time points (3, 5, 7, 10 min) and temperature (80 °C, 100 °C and 120 °C).

| RCC%       | 80 °C      |           | 100 °C     |            | 120 °C    |      |
|------------|------------|-----------|------------|------------|-----------|------|
| Time [min] | TLC        | HPLC      | TLC        | HPLC       | TLC       | HPLC |
| 1          | 0          | 0         | 27.1 ± 3   | 24.3 ± 0.4 | -         | -    |
| 3          | 11.5 ± 2   | 9.7 ± 1   | 27 ± 0.7   | 23.9 ± 1   | 6 ± 0.4   | 3    |
| 5          | 10.6 ± 2   | 12.1 ± 4  | 36.8 ± 5   | 38.6 ± 2   | 4.5 ± 0.5 | 4.7  |
| 7          | 12.4 ± 0.1 | 10 ± 0.8  | 26.2 ± 0.1 | 23.6 ± 2   | 5.6       | 4.8  |
| 10         | 13.8       | 4.7 ± 0.2 | 21.5 ± 3   | 13.8 ± 4   | 5.2       | 2.2  |

Analytical Radio-HPLC and semi-preparative HPLC chromatograms of formulated [ $^{18}\text{F}$ ]Tzs

*Chromatograms of manual synthesis*

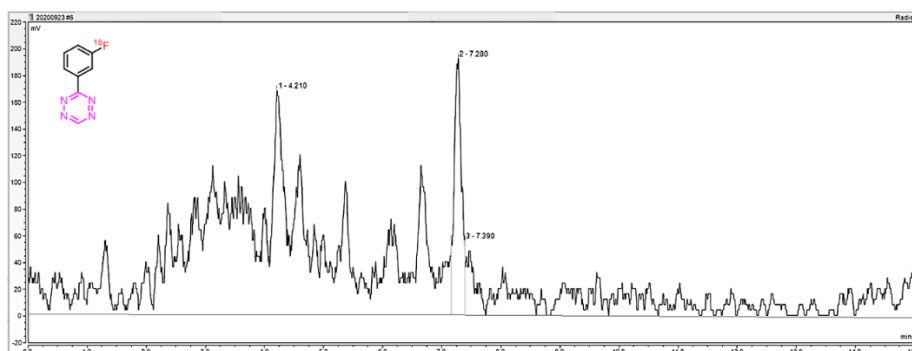

| Integration Result |                      |             |             |                   |
|--------------------|----------------------|-------------|-------------|-------------------|
| No.                | Retention Time [min] | Area mV·min | Height [mV] | Relative Area [%] |
| 1                  | 4.210                | 325.8       | 167.88      | 72.55             |
| 2                  | 7.280                | 26.582      | 192.13      | 5.92              |
| 3                  | 7.390                | 96.707      | 56.02       | 21.53             |
| Total              |                      | 449.08      | 416.04      | 100.00            |

**Figure S1.** Radio-HPLC chromatogram of crude mixture of [ $^{18}\text{F}$ ]1 (Rt = 7.280 min). Reaction conditions: [ $^{18}\text{F}$ ]KF, Cu(OTf)<sub>2</sub>, pyridine, DMA, 5 min, 100 °C, 5.92 % RCC ([ $^{18}\text{F}$ ]3).

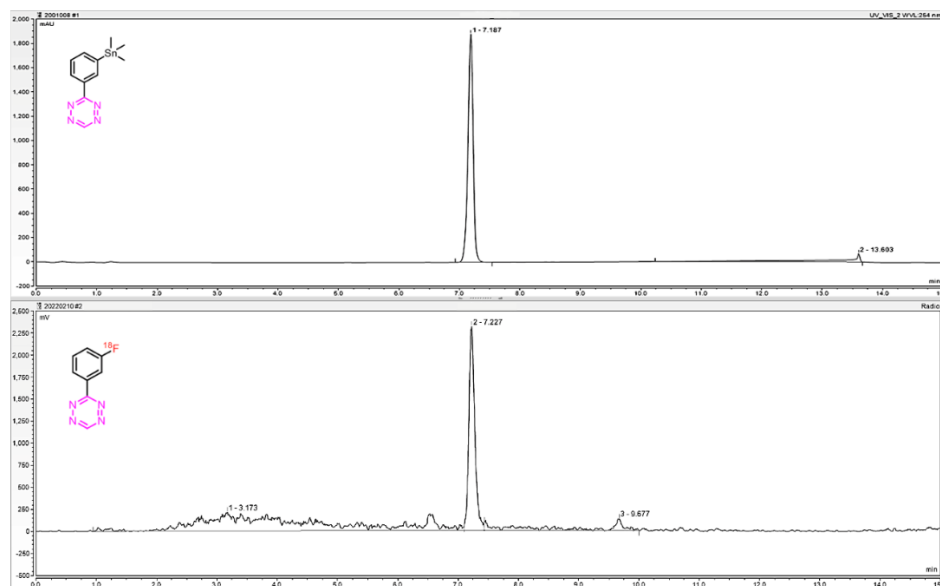

| Integration Result |                      |             |             |                   |
|--------------------|----------------------|-------------|-------------|-------------------|
| No.                | Retention Time [min] | Area mV·min | Height [mV] | Relative Area [%] |
| 1                  | 3.173                | 431.578     | 210.7       | 56.4              |
| 2                  | 7.227                | 261.329     | 2309.49     | 34.2              |
| 3                  | 9.677                | 72.258      | 134.57      | 9.4               |
| Total              |                      | 765.165     | 2654.76     | 100.00            |

**Figure S2.** Analytical-HPLC chromatogram of reference compound 3 (UV/Vis, 254 nm) and radio-HPLC chromatogram of crude mixture of [ $^{18}\text{F}$ ]1 (Rt = 7.227 min). Reaction conditions: [ $^{18}\text{F}$ ]Bu<sub>4</sub>NF, Cu(OTf)<sub>2</sub>Py<sub>4</sub>, DMA, 5 min, 100 °C, 34.2 % RCC ([ $^{18}\text{F}$ ]3).

## Chromatograms of automated synthesis

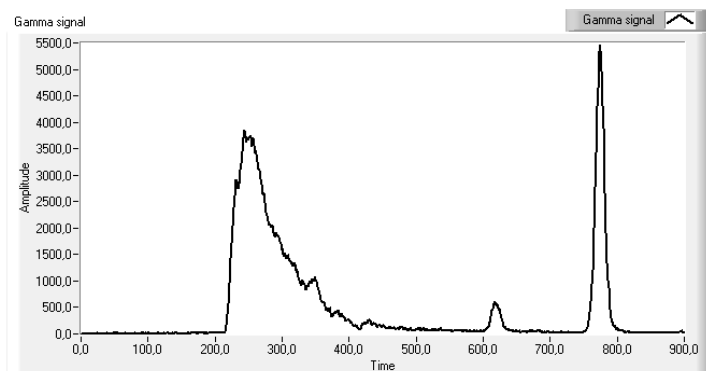

**Figure S3.** Semi-preparative HPLC chromatogram for  $[^{18}\text{F}]\mathbf{1}$  ( $R_t = 790$  s).

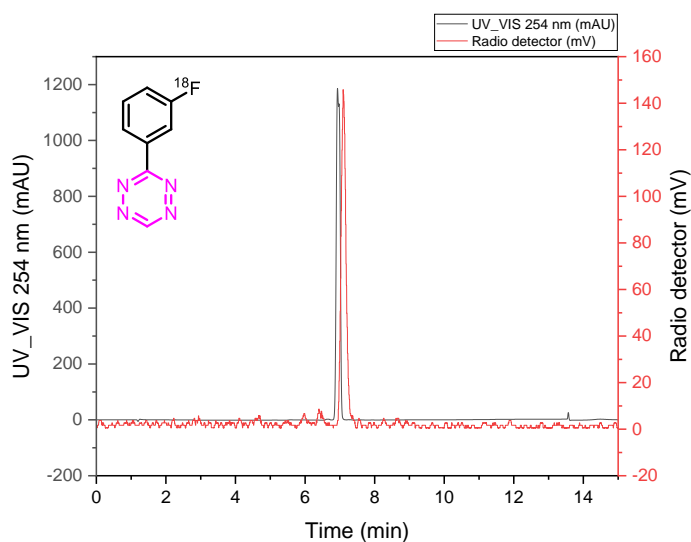

**Figure S4.** Analytical-HPLC chromatogram of reference compound **1** (UV/Vis, 254 nm) and radio-HPLC chromatogram of formulated  $[^{18}\text{F}]\mathbf{1}$  ( $R_t = 6.87$  min). The solid red line indicates the radio-HPLC  $[^{18}\text{F}]$ tracer and the solid black line indicates the UV trace for the cold reference compound.

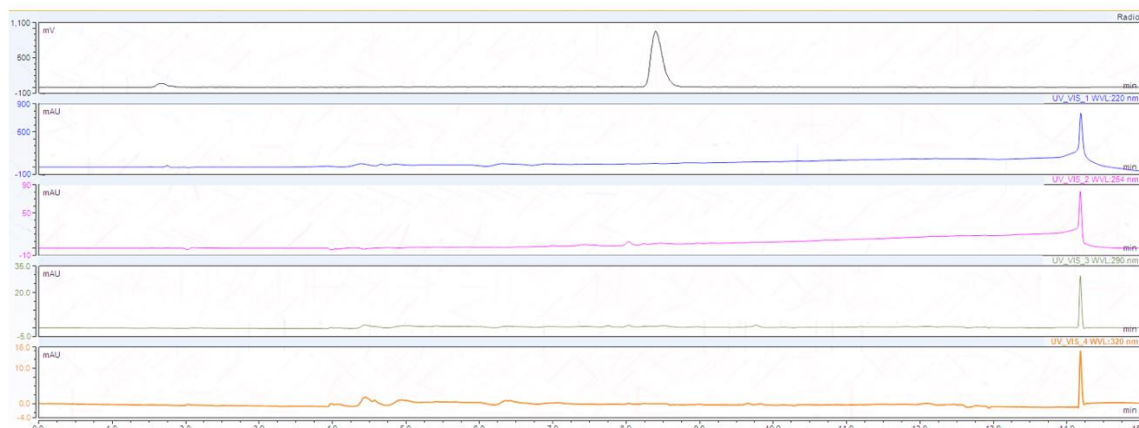

**Figure S5.** Radio-HPLC chromatogram of formulated  $[^{18}\text{F}]\mathbf{1}$  ( $R_t = 6.87$  min) black line, followed by UV\_VIS spectra 220 nm (blue), 254 (magenta), 290 nm (green) and 320 nm (orange).

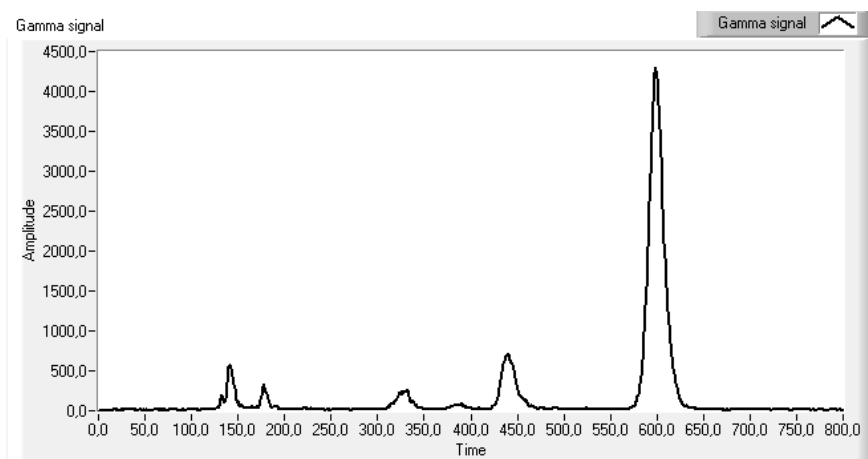

**Figure S6.** Semi-preparative HPLC chromatogram for [ $^{18}\text{F}$ ]**3** ( $R_t = 580$  s)

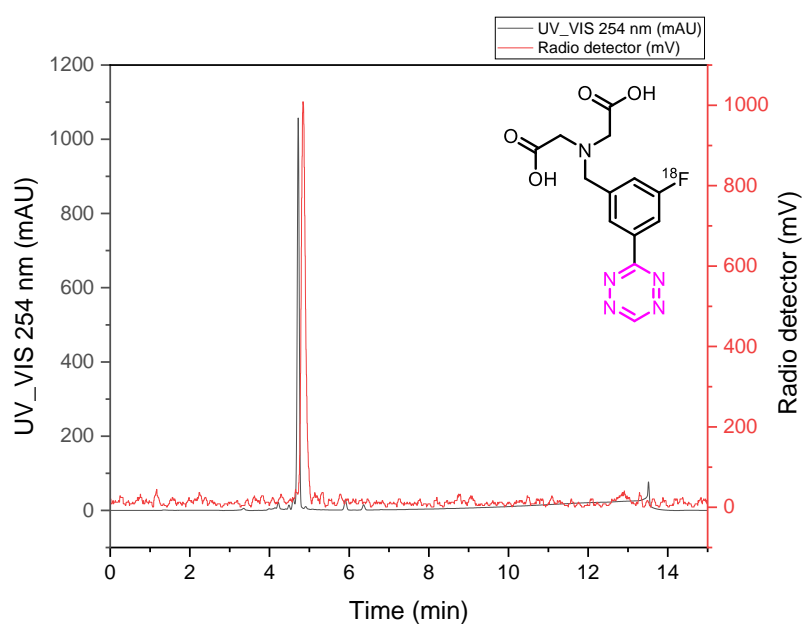

**Figure S7.** Analytical-HPLC chromatogram of reference compound **3** (UV/Vis, 254 nm) and radio-HPLC chromatogram of formulated [ $^{18}\text{F}$ ]**3** ( $R_t = 4.86$  min).

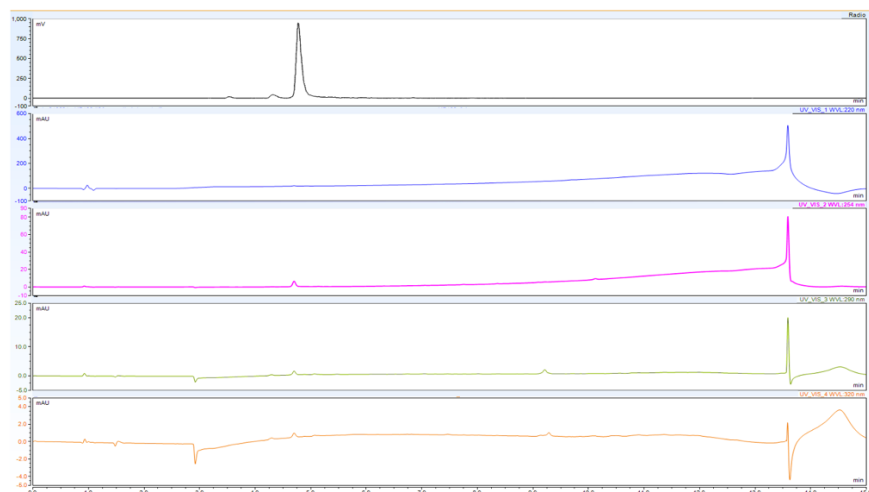

**Figure S8.** Radio-HPLC chromatogram of formulated  $[^{18}\text{F}]\mathbf{3}$  ( $R_t$  = 4.86 min). black line, followed by UV\_VIS spectra 220 nm (blue), 254 nm (magenta), 290 nm (green) and 320 nm (orange).
